# Supplementary material
Source: PubMed Central journal article supplement (PMC2860782)
Supplement: NIHMS195995-supplement-Supplementary_Tables.pdf [file NIHMS195995-supplement-Supplementary_Tables.pdf]

**Supplementary Table 1a.** Quantitative association results for the candidate loci in the European American BMI cohort, ages 2-5 years old (n=1,398), sorted by chromosomal location.

| Chr   | SNP          | Position (Build 36) | Nearby genes(s)         | NMISS | BETA      | SE      | R2          | T       | P        |
|-------|--------------|---------------------|-------------------------|-------|-----------|---------|-------------|---------|----------|
| 1p31  | rs3101336    | 72523773            | <i>NEGR1</i>            | 1398  | -0.1518   | 0.07882 | 0.00265     | -1.926  | 0.05431  |
| 1p31  | rs2568958    | 72537704            | <i>NEGR1</i>            | 1398  | -0.1518   | 0.07882 | 0.00265     | -1.926  | 0.05431  |
| 1q25  | rs10913469   | 176180142           | <i>SEC16B/RASAL2</i>    | 1397  | 0.2375    | 0.09777 | 0.004214    | 2.43    | 0.01524  |
| 2p25  | rs2867125    | 612827              | <i>TMEM18</i>           | 1396  | -0.06728  | 0.09808 | 0.0003374   | -0.6859 | 0.4929   |
| 2p25  | rs4854344    | 628144              | <i>TMEM18</i>           | 1393  | -0.09042  | 0.09834 | 0.0006074   | -0.9195 | 0.358    |
| 2p25  | rs7561317    | 634953              | <i>TMEM18</i>           | 1396  | -0.08938  | 0.09799 | 0.0005965   | -0.9122 | 0.3618   |
| 2q14  | rs17047697*  | 118544280           | <i>INSIG2</i>           | 1398  | 0.01838   | 0.07895 | 0.00003883  | 0.2328  | 0.8159   |
| 3q27  | rs7647305    | 187316984           | <i>SFRS10/ETV5/DGKG</i> | 1397  | 0.05741   | 0.08975 | 0.0002932   | 0.6397  | 0.5225   |
| 4p13  | rs13130484** | 44870448            | <i>GNPDA2</i>           | 1398  | 0.01343   | 0.07584 | 0.00002248  | 0.1772  | 0.8594   |
| 11p12 | rs10838738   | 47619625            | <i>MTCH2</i>            | 1397  | 0.05531   | 0.08    | 0.0003425   | 0.6914  | 0.4895   |
| 11p14 | rs4074134    | 27603861            | <i>BDNF</i>             | 1398  | -0.2598   | 0.09176 | 0.00571     | -2.831  | 0.004701 |
| 11p14 | rs4923461    | 27613486            | <i>BDNF</i>             | 1397  | -0.2549   | 0.0918  | 0.005496    | -2.777  | 0.005567 |
| 11p14 | rs925946     | 27623778            | <i>BDNF</i>             | 1398  | 0.1072    | 0.08295 | 0.001195    | 1.292   | 0.1965   |
| 11p14 | rs10501087   | 27626684            | <i>BDNF</i>             | 1398  | -0.2289   | 0.09164 | 0.004449    | -2.498  | 0.01261  |
| 11p14 | rs6265       | 27636492            | <i>BDNF</i>             | 1398  | -0.2531   | 0.09592 | 0.004964    | -2.639  | 0.008407 |
| 12q13 | rs7138803    | 48533735            | <i>BCDIN3D/FAIM2</i>    | 1398  | -0.01815  | 0.07891 | 0.00003791  | -0.2301 | 0.8181   |
| 16p11 | rs8049439    | 28745016            | <i>SH2B1</i>            | 1398  | -0.01705  | 0.07797 | 0.00003424  | -0.2186 | 0.827    |
| 16p11 | rs4788102    | 28780899            | <i>SH2B1</i>            | 1397  | -0.008532 | 0.0784  | 0.000008489 | -0.1088 | 0.9134   |
| 16q12 | rs6499640    | 52327178            | <i>FTO</i>              | 1398  | 0.03457   | 0.07817 | 0.0001401   | 0.4422  | 0.6584   |
| 16q12 | rs8050136    | 52373776            | <i>FTO</i>              | 1398  | 0.03214   | 0.07902 | 0.0001185   | 0.4067  | 0.6843   |
| 16q12 | rs3751812    | 52375961            | <i>FTO</i>              | 1396  | 0.01906   | 0.07875 | 0.000042    | 0.242   | 0.8088   |
| 16q12 | rs7190492    | 52386253            | <i>FTO</i>              | 1387  | 0.09075   | 0.08002 | 0.0009277   | 1.134   | 0.257    |
| 16q12 | rs8044769    | 52396636            | <i>FTO</i>              | 1398  | -0.04728  | 0.076   | 0.0002772   | -0.6222 | 0.5339   |
| 18q21 | rs12970134   | 56035730            | <i>MC4R</i>             | 1398  | -0.1039   | 0.0849  | 0.001072    | -1.224  | 0.2212   |
| 19q13 | rs29941      | 39001372            | <i>KCTD15</i>           | 1391  | 0.05539   | 0.08367 | 0.0003155   | 0.662   | 0.5081   |

NMISS: number of individuals tested; BETA: regression coefficient for the test SNP; SE: standard error of the regression coefficient; R2:  $r^2$  value in linear regression; T: test statistic; P: two-sided trend test  $P$ -value. The direction of effect is shown for the minor allele in each case. *NEGR1*:  $r^2$  between rs3101336 and rs2568958 = 1; *TMEM18*:  $r^2$  between rs2867125 rs4854344 and rs7561317 = 1; *BDNF*:  $r^2$  between rs4074134, rs4923461 and rs10501087 = 1 and  $r^2$  between rs4074134 and rs925946, rs6265 = 0.14 and 0.85 respectively; *SH2B1*:  $r^2$  between rs8049439 AND rs4788102 = 0.965; *FTO*:  $r^2$  between rs8050136 and rs3751812, rs7190492, rs8044769, rs6499640 = 1, 0.38, 0.61 and 0.18 respectively.

\* perfect surrogate for rs7566605

\*\* perfect surrogate for rs10938397

**Supplementary Table 1b.** Quantitative association results for the candidate loci in the European American BMI cohort, ages 6-10 years old (n=1,346), sorted by chromosomal location.

| Chr   | SNP          | Position (Build 36) | Nearby genes(s)         | NMISS | BETA       | SE     | R2          | T         | P        |
|-------|--------------|---------------------|-------------------------|-------|------------|--------|-------------|-----------|----------|
| 1p31  | rs3101336    | 72523773            | <i>NEGR1</i>            | 1345  | -0.05401   | 0.1283 | 0.0001318   | -0.4208   | 0.674    |
| 1p31  | rs2568958    | 72537704            | <i>NEGR1</i>            | 1346  | -0.05466   | 0.1283 | 0.000135    | -0.426    | 0.6701   |
| 1q25  | rs10913469   | 176180142           | <i>SEC16B/RASAL2</i>    | 1346  | 0.3563     | 0.1579 | 0.003773    | 2.256     | 0.02422  |
| 2p25  | rs2867125    | 612827              | <i>TMEM18</i>           | 1346  | -0.4196    | 0.1627 | 0.004924    | -2.579    | 0.01002  |
| 2p25  | rs4854344    | 628144              | <i>TMEM18</i>           | 1338  | -0.4137    | 0.1631 | 0.004793    | -2.536    | 0.01131  |
| 2p25  | rs7561317    | 634953              | <i>TMEM18</i>           | 1342  | -0.4404    | 0.1617 | 0.005503    | -2.723    | 0.006552 |
| 2q14  | rs17047697*  | 118544280           | <i>INSIG2</i>           | 1345  | 0.1238     | 0.1303 | 0.0006717   | 0.9501    | 0.3422   |
| 3q27  | rs7647305    | 187316984           | <i>SFRS10/ETV5/DGKG</i> | 1346  | 0.1175     | 0.1465 | 0.0004783   | 0.802     | 0.4227   |
| 4p13  | rs13130484** | 44870448            | <i>GNPDA2</i>           | 1346  | 0.2818     | 0.1232 | 0.003876    | 2.287     | 0.02236  |
| 11p12 | rs10838738   | 47619625            | <i>MTCH2</i>            | 1342  | 0.06895    | 0.1308 | 0.0002073   | 0.5272    | 0.5982   |
| 11p14 | rs4074134    | 27603861            | <i>BDNF</i>             | 1346  | 0.1096     | 0.1537 | 0.0003785   | 0.7134    | 0.4757   |
| 11p14 | rs4923461    | 27613486            | <i>BDNF</i>             | 1346  | 0.1047     | 0.1533 | 0.0003466   | 0.6826    | 0.4949   |
| 11p14 | rs925946     | 27623778            | <i>BDNF</i>             | 1346  | -0.08914   | 0.1393 | 0.0003044   | -0.6397   | 0.5224   |
| 11p14 | rs10501087   | 27626684            | <i>BDNF</i>             | 1346  | 0.1192     | 0.1533 | 0.0004498   | 0.7777    | 0.4369   |
| 11p14 | rs6265       | 27636492            | <i>BDNF</i>             | 1346  | -0.02901   | 0.1592 | 0.00002471  | -0.1822   | 0.8554   |
| 12q13 | rs7138803    | 48533735            | <i>BCDIN3D/FAIM2</i>    | 1346  | 0.103      | 0.1245 | 0.0005092   | 0.8275    | 0.4081   |
| 16p11 | rs8049439    | 28745016            | <i>SH2B1</i>            | 1346  | -0.01362   | 0.1308 | 0.000008058 | -0.1041   | 0.9171   |
| 16p11 | rs4788102    | 28780899            | <i>SH2B1</i>            | 1345  | -0.0001887 | 0.1304 | 1.558E-09   | -0.001447 | 0.9988   |
| 16q12 | rs6499640    | 52327178            | <i>FTO</i>              | 1346  | 0.05059    | 0.1254 | 0.0001212   | 0.4036    | 0.6866   |
| 16q12 | rs8050136    | 52373776            | <i>FTO</i>              | 1346  | 0.3727     | 0.1239 | 0.006693    | 3.009     | 0.002667 |
| 16q12 | rs3751812    | 52375961            | <i>FTO</i>              | 1343  | 0.3949     | 0.1243 | 0.007472    | 3.177     | 0.00152  |
| 16q12 | rs7190492    | 52386253            | <i>FTO</i>              | 1332  | -0.292     | 0.1315 | 0.003695    | -2.221    | 0.02653  |
| 16q12 | rs8044769    | 52396636            | <i>FTO</i>              | 1345  | -0.3894    | 0.1227 | 0.007438    | -3.172    | 0.001546 |
| 18q21 | rs12970134   | 56035730            | <i>MC4R</i>             | 1346  | 0.2986     | 0.1416 | 0.003297    | 2.109     | 0.03516  |
| 19q13 | rs29941      | 39001372            | <i>KCTD15</i>           | 1341  | -0.1657    | 0.1336 | 0.001149    | -1.241    | 0.2149   |

NMISS: number of individuals tested; BETA: regression coefficient for the test SNP; SE: standard error of the regression coefficient; R2:  $r^2$  value in linear regression; T: test statistic; P: two-sided trend test  $P$ -value. The direction of effect is shown for the minor allele in each case. *NEGR1*:  $r^2$  between rs3101336 and rs2568958 = 1; *TMEM18*:  $r^2$  between rs2867125 rs4854344 and rs7561317 = 1; *BDNF*:  $r^2$  between rs4074134, rs4923461 and rs10501087 = 1 and  $r^2$  between rs4074134 and rs925946, rs6265 = 0.14 and 0.85 respectively; *SH2B1*:  $r^2$  between rs8049439 AND rs4788102 = 0.965; *FTO*:  $r^2$  between rs8050136 and rs3751812, rs7190492, rs8044769, rs6499640 = 1, 0.38, 0.61 and 0.18 respectively.

\* perfect surrogate for rs7566605

\*\* perfect surrogate for rs10938397

**Supplementary Table 1c.** Quantitative association results for the candidate loci in the European American BMI cohort, ages 11-14 years old (n=1,363), sorted by chromosomal location.

| Chr   | SNP          | Position (Build 36) | Nearby genes(s)         | NMISS | BETA     | SE     | R2          | T       | P        |
|-------|--------------|---------------------|-------------------------|-------|----------|--------|-------------|---------|----------|
| 1p31  | rs3101336    | 72523773            | <i>NEGR1</i>            | 1363  | -0.2519  | 0.1591 | 0.001839    | -1.584  | 0.1135   |
| 1p31  | rs2568958    | 72537704            | <i>NEGR1</i>            | 1363  | -0.2376  | 0.1589 | 0.001641    | -1.496  | 0.135    |
| 1q25  | rs10913469   | 176180142           | <i>SEC16B/RASAL2</i>    | 1363  | 0.02015  | 0.2009 | 0.000007396 | 0.1003  | 0.9201   |
| 2p25  | rs2867125    | 612827              | <i>TMEM18</i>           | 1363  | -0.36    | 0.2013 | 0.002345    | -1.789  | 0.07387  |
| 2p25  | rs4854344    | 628144              | <i>TMEM18</i>           | 1353  | -0.3426  | 0.2013 | 0.002139    | -1.702  | 0.089    |
| 2p25  | rs7561317    | 634953              | <i>TMEM18</i>           | 1361  | -0.312   | 0.2012 | 0.001766    | -1.551  | 0.1212   |
| 2q14  | rs17047697*  | 118544280           | <i>INSIG2</i>           | 1363  | 0.04786  | 0.165  | 0.00006185  | 0.2901  | 0.7718   |
| 3q27  | rs7647305    | 187316984           | <i>SFRS10/ETV5/DGKG</i> | 1362  | -0.02148 | 0.1933 | 0.000009087 | -0.1112 | 0.9115   |
| 4p13  | rs13130484** | 44870448            | <i>GNPDA2</i>           | 1363  | 0.2899   | 0.1518 | 0.002672    | 1.91    | 0.05638  |
| 11p12 | rs10838738   | 47619625            | <i>MTCH2</i>            | 1361  | 0.06949  | 0.1607 | 0.0001376   | 0.4324  | 0.6655   |
| 11p14 | rs4074134    | 27603861            | <i>BDNF</i>             | 1363  | -0.3453  | 0.1855 | 0.002541    | -1.862  | 0.06282  |
| 11p14 | rs4923461    | 27613486            | <i>BDNF</i>             | 1363  | -0.3318  | 0.1864 | 0.002323    | -1.78   | 0.07526  |
| 11p14 | rs925946     | 27623778            | <i>BDNF</i>             | 1363  | 0.09796  | 0.1725 | 0.0002368   | 0.5678  | 0.5703   |
| 11p14 | rs10501087   | 27626684            | <i>BDNF</i>             | 1362  | -0.3761  | 0.187  | 0.002966    | -2.011  | 0.04448  |
| 11p14 | rs6265       | 27636492            | <i>BDNF</i>             | 1363  | -0.3933  | 0.1972 | 0.002914    | -1.994  | 0.04632  |
| 12q13 | rs7138803    | 48533735            | <i>BCDIN3D/FAIM2</i>    | 1363  | 0.06474  | 0.1579 | 0.0001234   | 0.4099  | 0.682    |
| 16p11 | rs8049439    | 28745016            | <i>SH2B1</i>            | 1363  | 0.1308   | 0.1578 | 0.0005044   | 0.8287  | 0.4074   |
| 16p11 | rs4788102    | 28780899            | <i>SH2B1</i>            | 1363  | 0.1231   | 0.158  | 0.0004461   | 0.7793  | 0.4359   |
| 16q12 | rs6499640    | 52327178            | <i>FTO</i>              | 1362  | -0.1809  | 0.1617 | 0.0009193   | -1.119  | 0.2635   |
| 16q12 | rs8050136    | 52373776            | <i>FTO</i>              | 1363  | 0.4077   | 0.1548 | 0.00507     | 2.634   | 0.008543 |
| 16q12 | rs3751812    | 52375961            | <i>FTO</i>              | 1362  | 0.4249   | 0.1542 | 0.005551    | 2.755   | 0.005941 |
| 16q12 | rs7190492    | 52386253            | <i>FTO</i>              | 1353  | -0.3499  | 0.1568 | 0.003671    | -2.231  | 0.02584  |
| 16q12 | rs8044769    | 52396636            | <i>FTO</i>              | 1363  | -0.3327  | 0.1531 | 0.003458    | -2.173  | 0.02994  |
| 18q21 | rs12970134   | 56035730            | <i>MC4R</i>             | 1363  | 0.2967   | 0.1751 | 0.002106    | 1.695   | 0.09037  |
| 19q13 | rs29941      | 39001372            | <i>KCTD15</i>           | 1356  | -0.2595  | 0.1655 | 0.001813    | -1.568  | 0.1171   |

NMISS: number of individuals tested; BETA: regression coefficient for the test SNP; SE: standard error of the regression coefficient; R2:  $r^2$  value in linear regression; T: test statistic; P: two-sided trend test  $P$ -value. The direction of effect is shown for the minor allele in each case. *NEGR1*:  $r^2$  between rs3101336 and rs2568958 = 1; *TMEM18*:  $r^2$  between rs2867125 rs4854344 and rs7561317 = 1; *BDNF*:  $r^2$  between rs4074134, rs4923461 and rs10501087 = 1 and  $r^2$  between rs4074134 and rs925946, rs6265 = 0.14 and 0.85 respectively; *SH2B1*:  $r^2$  between rs8049439 AND rs4788102 = 0.965; *FTO*:  $r^2$  between rs8050136 and rs3751812, rs7190492, rs8044769, rs6499640 = 1, 0.38, 0.61 and 0.18 respectively.

\* perfect surrogate for rs7566605

\*\* perfect surrogate for rs10938397

**Supplementary Table 1d.** Quantitative association results for the candidate loci in the European American BMI cohort, ages 15-18 years old (n=1,229), sorted by chromosomal location.

| Chr   | SNP          | Position (Build 36) | Nearby genes(s)         | NMISS | BETA     | SE     | R2          | T       | P       |
|-------|--------------|---------------------|-------------------------|-------|----------|--------|-------------|---------|---------|
| 1p31  | rs3101336    | 72523773            | <i>NEGR1</i>            | 1229  | -0.2123  | 0.1754 | 0.001192    | -1.21   | 0.2264  |
| 1p31  | rs2568958    | 72537704            | <i>NEGR1</i>            | 1229  | -0.2123  | 0.1754 | 0.001192    | -1.21   | 0.2264  |
| 1q25  | rs10913469   | 176180142           | <i>SEC16B/RASAL2</i>    | 1228  | 0.1405   | 0.2145 | 0.0003497   | 0.6549  | 0.5127  |
| 2p25  | rs2867125    | 612827              | <i>TMEM18</i>           | 1229  | -0.373   | 0.2081 | 0.002612    | -1.793  | 0.07327 |
| 2p25  | rs4854344    | 628144              | <i>TMEM18</i>           | 1224  | -0.3012  | 0.2083 | 0.001708    | -1.446  | 0.1484  |
| 2p25  | rs7561317    | 634953              | <i>TMEM18</i>           | 1226  | -0.3214  | 0.2074 | 0.001958    | -1.55   | 0.1215  |
| 2q14  | rs17047697*  | 118544280           | <i>INSIG2</i>           | 1227  | 0.3725   | 0.178  | 0.003565    | 2.093   | 0.03651 |
| 3q27  | rs7647305    | 187316984           | <i>SFRS10/ETV5/DGKG</i> | 1228  | 0.007981 | 0.2137 | 0.000001138 | 0.03735 | 0.9702  |
| 4p13  | rs13130484** | 44870448            | <i>GNPDA2</i>           | 1229  | 0.3688   | 0.1682 | 0.003906    | 2.193   | 0.02846 |
| 11p12 | rs10838738   | 47619625            | <i>MTCH2</i>            | 1228  | -0.1864  | 0.1753 | 0.0009213   | -1.063  | 0.2879  |
| 11p14 | rs4074134    | 27603861            | <i>BDNF</i>             | 1229  | -0.3363  | 0.1966 | 0.002379    | -1.71   | 0.08743 |
| 11p14 | rs4923461    | 27613486            | <i>BDNF</i>             | 1229  | -0.3039  | 0.1962 | 0.001952    | -1.549  | 0.1216  |
| 11p14 | rs925946     | 27623778            | <i>BDNF</i>             | 1229  | 0.3466   | 0.1886 | 0.002744    | 1.837   | 0.06638 |
| 11p14 | rs10501087   | 27626684            | <i>BDNF</i>             | 1229  | -0.2829  | 0.1957 | 0.001699    | -1.445  | 0.1487  |
| 11p14 | rs6265       | 27636492            | <i>BDNF</i>             | 1229  | -0.3537  | 0.2055 | 0.00241     | -1.722  | 0.0854  |
| 12q13 | rs7138803    | 48533735            | <i>BCDIN3D/FAIM2</i>    | 1229  | 0.3249   | 0.173  | 0.002867    | 1.878   | 0.06057 |
| 16p11 | rs8049439    | 28745016            | <i>SH2B1</i>            | 1228  | -0.1902  | 0.1673 | 0.001053    | -1.137  | 0.2559  |
| 16p11 | rs4788102    | 28780899            | <i>SH2B1</i>            | 1228  | -0.1854  | 0.1674 | 0.0009995   | -1.108  | 0.2683  |
| 16q12 | rs6499640    | 52327178            | <i>FTO</i>              | 1229  | -0.4521  | 0.1743 | 0.005456    | -2.594  | 0.00959 |
| 16q12 | rs8050136    | 52373776            | <i>FTO</i>              | 1229  | 0.2198   | 0.1703 | 0.001356    | 1.291   | 0.197   |
| 16q12 | rs3751812    | 52375961            | <i>FTO</i>              | 1229  | 0.254    | 0.1709 | 0.001796    | 1.486   | 0.1376  |
| 16q12 | rs7190492    | 52386253            | <i>FTO</i>              | 1215  | -0.3413  | 0.1748 | 0.003133    | -1.953  | 0.0511  |
| 16q12 | rs8044769    | 52396636            | <i>FTO</i>              | 1229  | -0.2647  | 0.165  | 0.002093    | -1.604  | 0.1089  |
| 18q21 | rs12970134   | 56035730            | <i>MC4R</i>             | 1229  | 0.2597   | 0.1955 | 0.001436    | 1.328   | 0.1843  |
| 19q13 | rs29941      | 39001372            | <i>KCTD15</i>           | 1227  | -0.2844  | 0.18   | 0.002035    | -1.58   | 0.1143  |

NMISS: number of individuals tested; BETA: regression coefficient for the test SNP; SE: standard error of the regression coefficient; R2:  $r^2$  value in linear regression; T: test statistic; P: two-sided trend test  $P$ -value. The direction of effect is shown for the minor allele in each case. *NEGR1*:  $r^2$  between rs3101336 and rs2568958 = 1; *TMEM18*:  $r^2$  between rs2867125 rs4854344 and rs7561317 = 1; *BDNF*:  $r^2$  between rs4074134, rs4923461 and rs10501087 = 1 and  $r^2$  between rs4074134 and rs925946, rs6265 = 0.14 and 0.85 respectively; *SH2B1*:  $r^2$  between rs8049439 AND rs4788102 = 0.965; *FTO*:  $r^2$  between rs8050136 and rs3751812, rs7190492, rs8044769, rs6499640 = 1, 0.38, 0.61 and 0.18 respectively.

\* perfect surrogate for rs7566605

\*\* perfect surrogate for rs10938397

**Supplementary Table 2.** Generated results for the pairwise interaction analysis for the SNPs utilized in the study

| SNP1      | SNP2       | Interaction P-value |
|-----------|------------|---------------------|
| rs3101336 | rs2568958  | 0.5426298           |
| rs3101336 | rs10913469 | 0.5965965           |
| rs3101336 | rs2867125  | 0.9593254           |
| rs3101336 | rs4854344  | 0.8651253           |
| rs3101336 | rs7561317  | 0.855244            |
| rs3101336 | rs17047697 | 0.09629598          |
| rs3101336 | rs7647305  | 0.1307338           |
| rs3101336 | rs13130484 | 0.2575942           |
| rs3101336 | rs4074134  | 0.8141372           |
| rs3101336 | rs4923461  | 0.759126            |
| rs3101336 | rs925946   | 0.8675338           |
| rs3101336 | rs10501087 | 0.7197523           |
| rs3101336 | rs6265     | 0.3659815           |
| rs3101336 | rs10838738 | 0.02046539          |
| rs3101336 | rs7138803  | 0.92627             |
| rs3101336 | rs8049439  | 0.8429088           |
| rs3101336 | rs4788102  | 0.9947358           |
| rs3101336 | rs6499640  | 0.5073415           |
| rs3101336 | rs8050136  | 0.7576537           |
| rs3101336 | rs3751812  | 0.6348118           |
| rs3101336 | rs7190492  | 0.8883371           |
| rs3101336 | rs8044769  | 0.3610508           |
| rs3101336 | rs12970134 | 0.2799839           |
| rs3101336 | rs29941    | 0.31842             |
| rs2568958 | rs10913469 | 0.5821284           |
| rs2568958 | rs2867125  | 0.9725005           |
| rs2568958 | rs4854344  | 0.8773611           |
| rs2568958 | rs7561317  | 0.8676256           |
| rs2568958 | rs17047697 | 0.1049363           |
| rs2568958 | rs7647305  | 0.1228012           |
| rs2568958 | rs13130484 | 0.268242            |
| rs2568958 | rs4074134  | 0.8013281           |
| rs2568958 | rs4923461  | 0.7464502           |
| rs2568958 | rs925946   | 0.8914722           |
| rs2568958 | rs10501087 | 0.7000484           |
| rs2568958 | rs6265     | 0.3634434           |
| rs2568958 | rs10838738 | 0.02230235          |

|            |            |            |
|------------|------------|------------|
| rs2568958  | rs7138803  | 0.9510449  |
| rs2568958  | rs8049439  | 0.8772688  |
| rs2568958  | rs4788102  | 0.9707365  |
| rs2568958  | rs6499640  | 0.4698081  |
| rs2568958  | rs8050136  | 0.7332915  |
| rs2568958  | rs3751812  | 0.6122852  |
| rs2568958  | rs7190492  | 0.9432214  |
| rs2568958  | rs8044769  | 0.3366986  |
| rs2568958  | rs12970134 | 0.2643004  |
| rs2568958  | rs29941    | 0.32729    |
| rs10913469 | rs2867125  | 0.2089342  |
| rs10913469 | rs4854344  | 0.259792   |
| rs10913469 | rs7561317  | 0.2770409  |
| rs10913469 | rs17047697 | 0.2325459  |
| rs10913469 | rs7647305  | 0.7080737  |
| rs10913469 | rs13130484 | 0.2226665  |
| rs10913469 | rs4074134  | 0.9684096  |
| rs10913469 | rs4923461  | 0.9497973  |
| rs10913469 | rs925946   | 0.763443   |
| rs10913469 | rs10501087 | 0.7839498  |
| rs10913469 | rs6265     | 0.7473614  |
| rs10913469 | rs10838738 | 0.6462202  |
| rs10913469 | rs7138803  | 0.2739092  |
| rs10913469 | rs8049439  | 0.4349858  |
| rs10913469 | rs4788102  | 0.4436872  |
| rs10913469 | rs6499640  | 0.1743441  |
| rs10913469 | rs8050136  | 0.1701484  |
| rs10913469 | rs3751812  | 0.1599914  |
| rs10913469 | rs7190492  | 0.1837058  |
| rs10913469 | rs8044769  | 0.02407595 |
| rs10913469 | rs12970134 | 0.8437244  |
| rs10913469 | rs29941    | 0.789111   |
| rs2867125  | rs4854344  | 0.5594144  |
| rs2867125  | rs7561317  | 0.505087   |
| rs2867125  | rs17047697 | 0.6455099  |
| rs2867125  | rs7647305  | 0.4834891  |
| rs2867125  | rs13130484 | 0.6385008  |
| rs2867125  | rs4074134  | 0.4683074  |
| rs2867125  | rs4923461  | 0.462757   |
| rs2867125  | rs925946   | 0.9734523  |
| rs2867125  | rs10501087 | 0.6668178  |

|           |            |            |
|-----------|------------|------------|
| rs2867125 | rs6265     | 0.5847934  |
| rs2867125 | rs10838738 | 0.5026277  |
| rs2867125 | rs7138803  | 0.5420468  |
| rs2867125 | rs8049439  | 0.992213   |
| rs2867125 | rs4788102  | 0.9030264  |
| rs2867125 | rs6499640  | 0.1846917  |
| rs2867125 | rs8050136  | 0.5778292  |
| rs2867125 | rs3751812  | 0.5677058  |
| rs2867125 | rs7190492  | 0.6926406  |
| rs2867125 | rs8044769  | 0.9496317  |
| rs2867125 | rs12970134 | 0.5025457  |
| rs2867125 | rs29941    | 0.01414447 |
| rs4854344 | rs7561317  | 0.4274572  |
| rs4854344 | rs17047697 | 0.6512141  |
| rs4854344 | rs7647305  | 0.4991783  |
| rs4854344 | rs13130484 | 0.5442846  |
| rs4854344 | rs4074134  | 0.5968912  |
| rs4854344 | rs4923461  | 0.591312   |
| rs4854344 | rs925946   | 0.6816716  |
| rs4854344 | rs10501087 | 0.8041092  |
| rs4854344 | rs6265     | 0.7600465  |
| rs4854344 | rs10838738 | 0.6586318  |
| rs4854344 | rs7138803  | 0.5053294  |
| rs4854344 | rs8049439  | 0.7901504  |
| rs4854344 | rs4788102  | 0.8530297  |
| rs4854344 | rs6499640  | 0.1048812  |
| rs4854344 | rs8050136  | 0.5935833  |
| rs4854344 | rs3751812  | 0.5639875  |
| rs4854344 | rs7190492  | 0.6059535  |
| rs4854344 | rs8044769  | 0.9143665  |
| rs4854344 | rs12970134 | 0.5471426  |
| rs4854344 | rs29941    | 0.03972383 |
| rs7561317 | rs17047697 | 0.6500068  |
| rs7561317 | rs7647305  | 0.5019259  |
| rs7561317 | rs13130484 | 0.4328837  |
| rs7561317 | rs4074134  | 0.6881146  |
| rs7561317 | rs4923461  | 0.6820899  |
| rs7561317 | rs925946   | 0.6664429  |
| rs7561317 | rs10501087 | 0.9043638  |
| rs7561317 | rs6265     | 0.8653794  |
| rs7561317 | rs10838738 | 0.5944412  |

|            |            |            |
|------------|------------|------------|
| rs7561317  | rs7138803  | 0.5670327  |
| rs7561317  | rs8049439  | 0.7178133  |
| rs7561317  | rs4788102  | 0.7599673  |
| rs7561317  | rs6499640  | 0.08571495 |
| rs7561317  | rs8050136  | 0.5955442  |
| rs7561317  | rs3751812  | 0.5694193  |
| rs7561317  | rs7190492  | 0.5029344  |
| rs7561317  | rs8044769  | 0.9992407  |
| rs7561317  | rs12970134 | 0.5470017  |
| rs7561317  | rs29941    | 0.03295432 |
| rs17047697 | rs7647305  | 0.04365015 |
| rs17047697 | rs13130484 | 0.8997063  |
| rs17047697 | rs4074134  | 0.7064557  |
| rs17047697 | rs4923461  | 0.7809102  |
| rs17047697 | rs925946   | 0.9702104  |
| rs17047697 | rs10501087 | 0.8761745  |
| rs17047697 | rs6265     | 0.7412203  |
| rs17047697 | rs10838738 | 0.887213   |
| rs17047697 | rs7138803  | 0.4050733  |
| rs17047697 | rs8049439  | 0.390209   |
| rs17047697 | rs4788102  | 0.4090575  |
| rs17047697 | rs6499640  | 0.4308877  |
| rs17047697 | rs8050136  | 0.964426   |
| rs17047697 | rs3751812  | 0.949268   |
| rs17047697 | rs7190492  | 0.5224408  |
| rs17047697 | rs8044769  | 0.3862038  |
| rs17047697 | rs12970134 | 0.8361081  |
| rs17047697 | rs29941    | 0.02893868 |
| rs7647305  | rs13130484 | 0.3491789  |
| rs7647305  | rs4074134  | 0.4388801  |
| rs7647305  | rs4923461  | 0.4515584  |
| rs7647305  | rs925946   | 0.6476045  |
| rs7647305  | rs10501087 | 0.4180881  |
| rs7647305  | rs6265     | 0.4497136  |
| rs7647305  | rs10838738 | 0.0567835  |
| rs7647305  | rs7138803  | 0.4569564  |
| rs7647305  | rs8049439  | 0.5735946  |
| rs7647305  | rs4788102  | 0.3638487  |
| rs7647305  | rs6499640  | 0.08270957 |
| rs7647305  | rs8050136  | 0.4936853  |
| rs7647305  | rs3751812  | 0.5579699  |



|            |            |            |
|------------|------------|------------|
| rs7647305  | rs7190492  | 0.7597675  |
| rs7647305  | rs8044769  | 0.5498606  |
| rs7647305  | rs12970134 | 0.2459696  |
| rs7647305  | rs29941    | 0.07872918 |
| rs13130484 | rs4074134  | 0.3367494  |
| rs13130484 | rs4923461  | 0.3363247  |
| rs13130484 | rs925946   | 0.9514496  |
| rs13130484 | rs10501087 | 0.4434153  |
| rs13130484 | rs6265     | 0.4803812  |
| rs13130484 | rs10838738 | 0.1153455  |
| rs13130484 | rs7138803  | 0.05294545 |
| rs13130484 | rs8049439  | 0.2826221  |
| rs13130484 | rs4788102  | 0.3143131  |
| rs13130484 | rs6499640  | 0.1593905  |
| rs13130484 | rs8050136  | 0.1199675  |
| rs13130484 | rs3751812  | 0.1721203  |
| rs13130484 | rs7190492  | 0.3022548  |
| rs13130484 | rs8044769  | 0.4630632  |
| rs13130484 | rs12970134 | 0.2761709  |
| rs13130484 | rs29941    | 0.3392573  |
| rs4074134  | rs4923461  | 0.04416204 |
| rs4074134  | rs925946   | 0.1390528  |
| rs4074134  | rs10501087 | 0.05665906 |
| rs4074134  | rs6265     | 0.03116486 |
| rs4074134  | rs10838738 | 0.1830074  |
| rs4074134  | rs7138803  | 0.6881522  |
| rs4074134  | rs8049439  | 0.6790939  |
| rs4074134  | rs4788102  | 0.7446867  |
| rs4074134  | rs6499640  | 0.7422871  |
| rs4074134  | rs8050136  | 0.3781207  |
| rs4074134  | rs3751812  | 0.4485845  |
| rs4074134  | rs7190492  | 0.635297   |
| rs4074134  | rs8044769  | 0.7466253  |
| rs4074134  | rs12970134 | 0.9319299  |
| rs4074134  | rs29941    | 0.2236998  |
| rs4923461  | rs925946   | 0.1593981  |
| rs4923461  | rs10501087 | 0.06011797 |
| rs4923461  | rs6265     | 0.02663972 |
| rs4923461  | rs10838738 | 0.2002019  |
| rs4923461  | rs7138803  | 0.8124377  |
| rs4923461  | rs8049439  | 0.6846376  |

|            |            |            |
|------------|------------|------------|
| rs4923461  | rs4788102  | 0.7484377  |
| rs4923461  | rs6499640  | 0.6761496  |
| rs4923461  | rs8050136  | 0.397316   |
| rs4923461  | rs3751812  | 0.4706288  |
| rs4923461  | rs7190492  | 0.6110018  |
| rs4923461  | rs8044769  | 0.8129892  |
| rs4923461  | rs12970134 | 0.9732195  |
| rs4923461  | rs29941    | 0.1963856  |
| rs925946   | rs10501087 | 0.166594   |
| rs925946   | rs6265     | 0.1927807  |
| rs925946   | rs10838738 | 0.6329604  |
| rs925946   | rs7138803  | 0.463526   |
| rs925946   | rs8049439  | 0.4597187  |
| rs925946   | rs4788102  | 0.4293884  |
| rs925946   | rs6499640  | 0.5378522  |
| rs925946   | rs8050136  | 0.3248367  |
| rs925946   | rs3751812  | 0.3355994  |
| rs925946   | rs7190492  | 0.2054767  |
| rs925946   | rs8044769  | 0.2262789  |
| rs925946   | rs12970134 | 0.5310707  |
| rs925946   | rs29941    | 0.8679507  |
| rs10501087 | rs6265     | 0.01437403 |
| rs10501087 | rs10838738 | 0.3043303  |
| rs10501087 | rs7138803  | 0.7264892  |
| rs10501087 | rs8049439  | 0.7157967  |
| rs10501087 | rs4788102  | 0.7903817  |
| rs10501087 | rs6499640  | 0.6357306  |
| rs10501087 | rs8050136  | 0.3686054  |
| rs10501087 | rs3751812  | 0.4122614  |
| rs10501087 | rs7190492  | 0.6257234  |
| rs10501087 | rs8044769  | 0.8339218  |
| rs10501087 | rs12970134 | 0.9550628  |
| rs10501087 | rs29941    | 0.1681064  |
| rs6265     | rs10838738 | 0.454364   |
| rs6265     | rs7138803  | 0.9568833  |
| rs6265     | rs8049439  | 0.7588125  |
| rs6265     | rs4788102  | 0.9397026  |
| rs6265     | rs6499640  | 0.9923873  |
| rs6265     | rs8050136  | 0.145954   |
| rs6265     | rs3751812  | 0.1618993  |
| rs6265     | rs7190492  | 0.8583125  |

|            |            |            |
|------------|------------|------------|
| rs6265     | rs8044769  | 0.3986417  |
| rs6265     | rs12970134 | 0.9037707  |
| rs6265     | rs29941    | 0.2004403  |
| rs10838738 | rs7138803  | 0.586398   |
| rs10838738 | rs8049439  | 0.6724482  |
| rs10838738 | rs4788102  | 0.759329   |
| rs10838738 | rs6499640  | 0.1716951  |
| rs10838738 | rs8050136  | 0.02098407 |
| rs10838738 | rs3751812  | 0.01866038 |
| rs10838738 | rs7190492  | 0.09865805 |
| rs10838738 | rs8044769  | 0.1106037  |
| rs10838738 | rs12970134 | 0.07335691 |
| rs10838738 | rs29941    | 0.6232244  |
| rs7138803  | rs8049439  | 0.5960872  |
| rs7138803  | rs4788102  | 0.6229137  |
| rs7138803  | rs6499640  | 0.09539043 |
| rs7138803  | rs8050136  | 0.9391088  |
| rs7138803  | rs3751812  | 0.8765034  |
| rs7138803  | rs7190492  | 0.5141909  |
| rs7138803  | rs8044769  | 0.5192093  |
| rs7138803  | rs12970134 | 0.6299725  |
| rs7138803  | rs29941    | 0.396505   |
| rs8049439  | rs4788102  | 0.2015838  |
| rs8049439  | rs6499640  | 0.4093848  |
| rs8049439  | rs8050136  | 0.4765228  |
| rs8049439  | rs3751812  | 0.4372451  |
| rs8049439  | rs7190492  | 0.7182272  |
| rs8049439  | rs8044769  | 0.1908751  |
| rs8049439  | rs12970134 | 0.6461274  |
| rs8049439  | rs29941    | 0.3193053  |
| rs4788102  | rs6499640  | 0.3914858  |
| rs4788102  | rs8050136  | 0.4539876  |
| rs4788102  | rs3751812  | 0.4245792  |
| rs4788102  | rs7190492  | 0.6753604  |
| rs4788102  | rs8044769  | 0.2002458  |
| rs4788102  | rs12970134 | 0.621217   |
| rs4788102  | rs29941    | 0.334995   |
| rs6499640  | rs8050136  | 0.2644145  |
| rs6499640  | rs3751812  | 0.3199444  |
| rs6499640  | rs7190492  | 0.4201946  |
| rs6499640  | rs8044769  | 0.7923899  |

|            |            |            |
|------------|------------|------------|
| rs6499640  | rs12970134 | 0.07875103 |
| rs6499640  | rs29941    | 0.819998   |
| rs8050136  | rs3751812  | 0.1610717  |
| rs8050136  | rs7190492  | 0.1108809  |
| rs8050136  | rs8044769  | 0.1854563  |
| rs8050136  | rs12970134 | 0.1433845  |
| rs8050136  | rs29941    | 0.9613013  |
| rs3751812  | rs7190492  | 0.1855744  |
| rs3751812  | rs8044769  | 0.2341319  |
| rs3751812  | rs12970134 | 0.1650695  |
| rs3751812  | rs29941    | 0.9210606  |
| rs7190492  | rs8044769  | 0.1696926  |
| rs7190492  | rs12970134 | 0.7701382  |
| rs7190492  | rs29941    | 0.2279837  |
| rs8044769  | rs12970134 | 0.6375124  |
| rs8044769  | rs29941    | 0.3059467  |
| rs12970134 | rs29941    | 0.2049041  |
